# Supplementary material for: Anatase and brookite TiO2with various morphologies and their proposed building block
Source: Royal Society of Chemistry journal article supplement (doi:10.1039/c3ce41750f), 2013-10-22
Supplement: c3ce41750f.pdf [file c3ce41750f.pdf]

ARTICLE

## Anatase and Brookite TiO<sub>2</sub> with Various Morphologies and Their Proposed Building Block

Cite this: DOI: 10.1039/x0xx00000x

Min-Han Yang,<sup>a</sup> Po-Chin Chen,<sup>b</sup> Min-Chiao Tsai,<sup>a</sup> Ting-Ting Chen,<sup>a</sup> I-Chun Chang,<sup>a</sup> Hsin-Tien Chiu<sup>b</sup> and Chi-Young Lee<sup>a\*</sup>

Received 00th January 2012,

Accepted 00th January 2012

DOI: 10.1039/x0xx00000x

www.rsc.org/

### Supporting Information

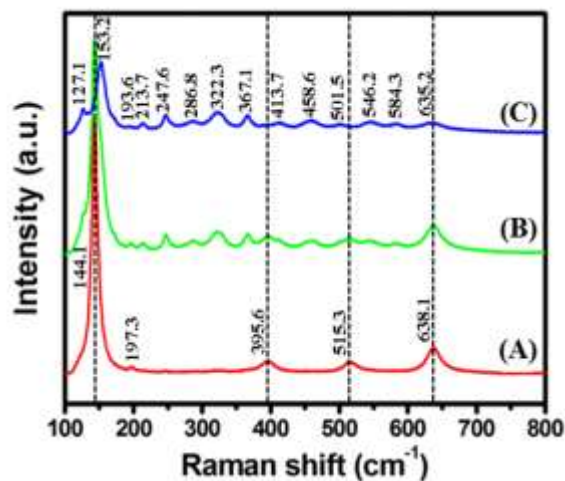

**Figure S1.** Raman spectrum of TiO<sub>2</sub> obtained in (A) 0 M (B) 0.4 M (D) 1 M NaF using T8 as a precursor in hydrothermal process.

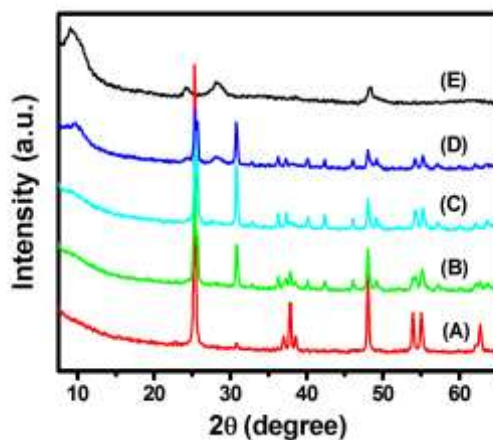

**Figure S2.** Powder XRD patterns of TiO<sub>2</sub> obtained in (A) 0 M (B) 0.4 M (C) 0.6 M (D) 1 M NaF using T8 (E) as a precursor in hydrothermal process.

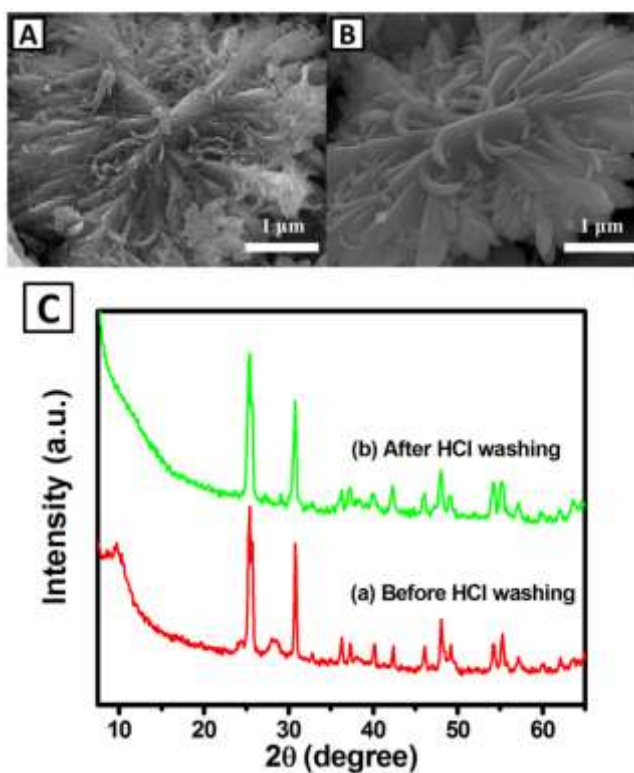

**Figure S3.** FESEM images of TiO<sub>2</sub> (A) before (B) after 1 M HCl washing. (C) Powder XRD patterns of TiO<sub>2</sub> (TiO<sub>2</sub> obtained in 1 M NaF using T8 as a precursor)

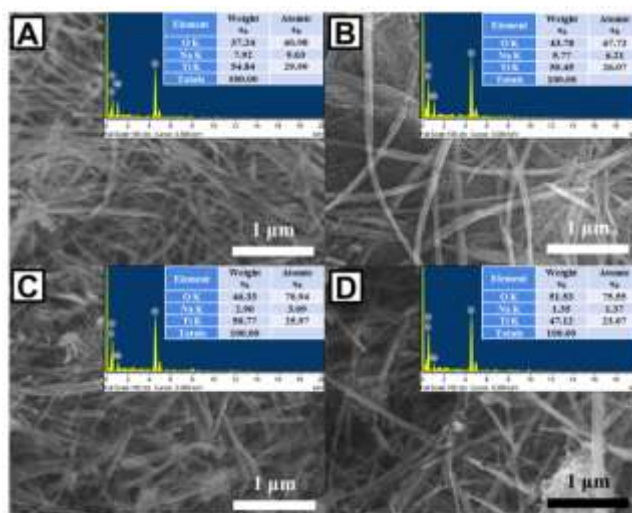

**Figure S4.** FESEM images and EDS analyses of acid treatment titanate (A) T8 (B) T5 (C) T4 (D) T2 in pH 8, pH 5, pH4 and pH 2 solutions, respectively.

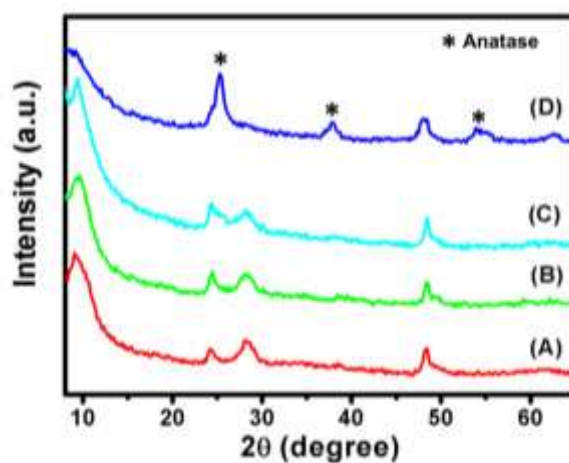

**Figure S5.** Powder XRD patterns of titanates (A) T8, (B) T5, (C) T4 and (D) T2.

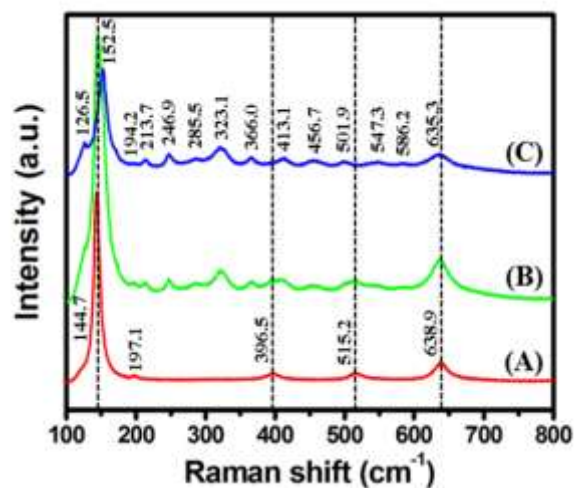

**Figure S6.** Raman spectrum of TiO<sub>2</sub> obtained in (A) 0 M (B) 0.4 M (D) 1 M NaF using T5 as a precursor in hydrothermal process.

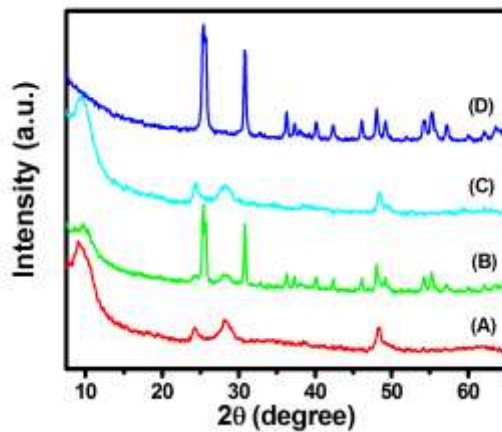

**Figure S7.** Powder XRD patterns of titanates (A) T8 (C) T5 were used as a precursor. TiO<sub>2</sub> (B) and (D) were obtained T8 and T5 precursors respectively in 1 M NaF.

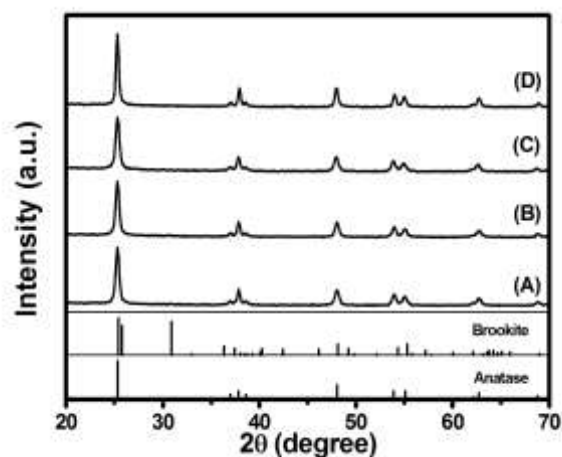

**Figure S8.** Powder XRD patterns of  $\text{TiO}_2$  obtained in the presence of 1 M (A) NaCl (B) NaBr (C) LiF (D) KF salts solution using T5 as a precursor in hydrothermal process.

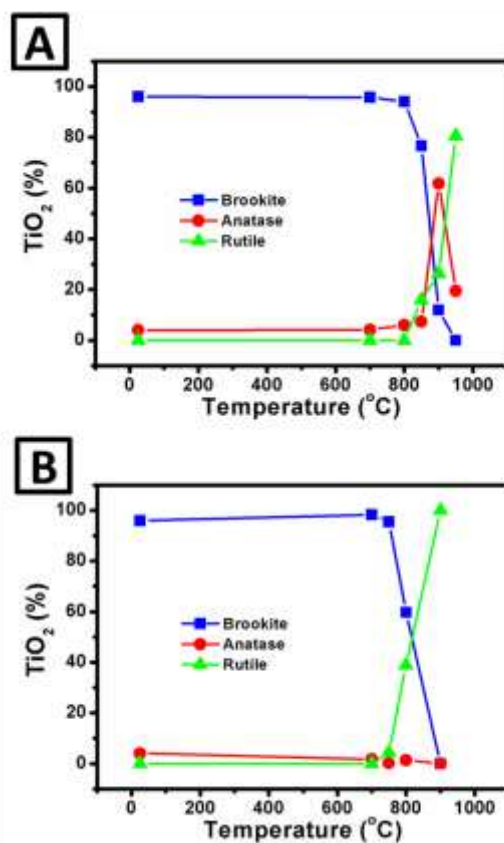

**Figure S9.** The contents of brookite, anatase and rutile  $\text{TiO}_2$  by annealed (A) micro-sized flower-like brookite (B) submicro-sized urchin-like brookite at different temperatures for 1 hr.

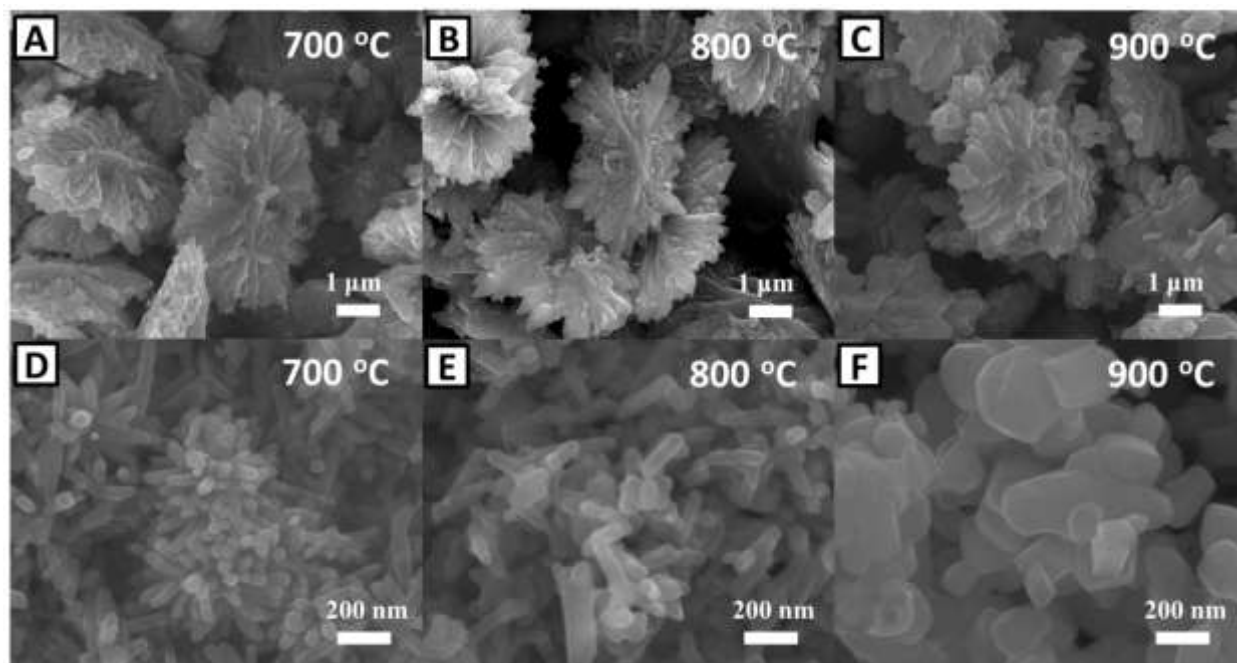

**Figure S10.** FESEM images of of (A)-(D) micro-sized flower-like brookite and (E)-(H) submicro-sized urchin-like brookite were annealed at various temperatures for 1 hr.

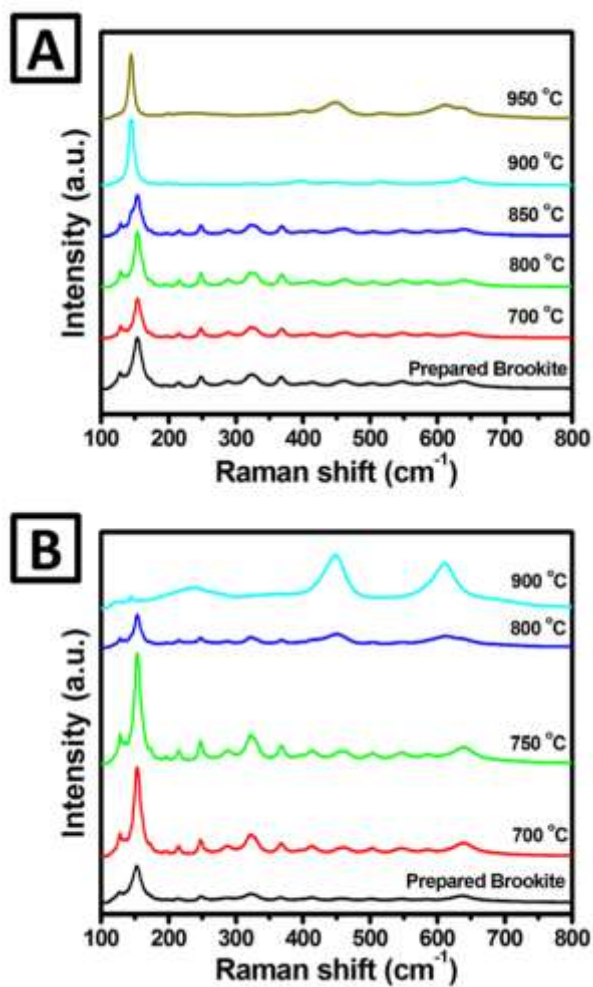

**Figure S11.** Raman spectra of (A) micro-sized flower-like brookite and (B) submicro-sized urchin-like brookite were annealed at various temperatures for 1 hr.
